# Supplementary material for: Rational Design of Novel Peptidomimetics against Influenza A Virus: Biological and Computational Studies
Source: MDPI journal article supplement (doi:10.3390/ijms241814268), 2023-09-19
Supplement: s1 [file s1]

## ***SUPPLEMENTARY MATERIALS***

### **Rational design of novel peptidomimetics against Influenza A virus: biological and computational studies**

**Maria Carmina Scala <sup>1</sup>, Magda Marchetti <sup>2</sup>, Fabiana Superti <sup>2,3</sup>, Mariangela Agamennone <sup>4</sup>, Pietro Campiglia <sup>1</sup> and Marina Sala <sup>1,\*</sup>**

<sup>1</sup> Department of Pharmacy, University of Salerno, Via Giovanni Paolo II 132, 84084 Fisciano, Italy; mscala@unisa.it (M.C.S.); pcampiglia@unisa.it (P.C.)

<sup>2</sup> National Centre for Innovative Technologies in Public Health, National Institute of Health, Viale Regina Elena, 299, 00161 Rome, Italy; magda.marchetti@iss.it (M.M.); fabiana.superti@iss.it (F.S.)

<sup>3</sup> Association for Research on Integrative Oncology Therapies (ARTOI) Foundation, Via Ludovico Micara, 73, 00165 Rome, Italy; fabiana.superti@artoi.it (F.S.)

<sup>4</sup> Department of Pharmacy, University “G. d’Annunzio” of Chieti-Pescara, Via dei Vestini 31, 66100 Chieti, Italy; magamennone@unich.it (M.A.)

\* Corresponding author: msala@unisa.it; Tel.: +39-(0)-89968148

#### **Table of contents:**

#### **Supplementary schemes and figures:**

|                       |                                                                                  |     |
|-----------------------|----------------------------------------------------------------------------------|-----|
| <b>Table S1:</b>      | Analytical data of peptides <b>1-18</b> .....                                    | S2  |
| <b>Figure S1-S16:</b> | HRMS spectra and HPLC chromatograms of peptide <b>3-18</b> .....                 | S3  |
| <b>Figure S17</b>     | Docked poses of compound <b>1</b> in the RBS of studied HAs .....                | S19 |
| <b>Figure S18</b>     | Docked poses of compound <b>6</b> in the RBS of studied HAs .....                | S19 |
| <b>Figure S19</b>     | Docked poses of 6'-sialyl-N-acetyllactosamine superimposed to the X-ray geometry | S20 |

**Table S1.** Analytical data of peptides **3-18**.

| <b>Pep.</b>          | <b>Sequence</b> | <b>HPLC<br/>k'<sup>a</sup></b> | <b>HRMS</b> |
|----------------------|-----------------|--------------------------------|-------------|
| <b>1<sup>b</sup></b> | SLDC            | 3.93                           | 477.18970   |
| <b>2<sup>b</sup></b> | SKHS            | 4.68                           | 499.26235   |
| <b>3</b>             | (N-Me)SLDC      | 8.00                           | 492.2860    |
| <b>4</b>             | S(N-Me)LDC      | 9.33                           | 492.2727    |
| <b>5</b>             | SL(N-Me)DC      | 5.20                           | 493.9463    |
| <b>6</b>             | SLD(N-Me)C      | 10.50                          | 492.9463    |
| <b>7</b>             | (N-Me)SKHS      | 7.88                           | 513.2344    |
| <b>8</b>             | S(N-Me)KHS      | 0.44                           | 513.2260    |
| <b>9</b>             | SK(N-Me)HS      | 0.50                           | 513.2026    |
| <b>10</b>            | SKH(N-Me)S      | 0.58                           | 513.2427    |
| <b>11</b>            | NhSLDC          | 4.55                           | 492.2759    |
| <b>12</b>            | SMLDC           | 4.75                           | 478.1846    |
| <b>13</b>            | SLNDC           | 1.15                           | 478.3001    |
| <b>14</b>            | SLDNhC          | 1.10                           | 493.2882    |
| <b>15</b>            | NhSKHS          | 1.15                           | 513.2335    |
| <b>16</b>            | SNKHS           | 1.40                           | 499.2022    |
| <b>17</b>            | SKNHS           | 2.40                           | 498.9463    |
| <b>18</b>            | SKHNhS          | 1.20                           | 513.2522    |

<sup>a</sup> k'=[(peptide retention time-solvent retention time)/solvent retention time]; <sup>b</sup> Scala et al. (2017).

## Supplementary figures of Mass spectrometry and HPLC of peptides used in the study

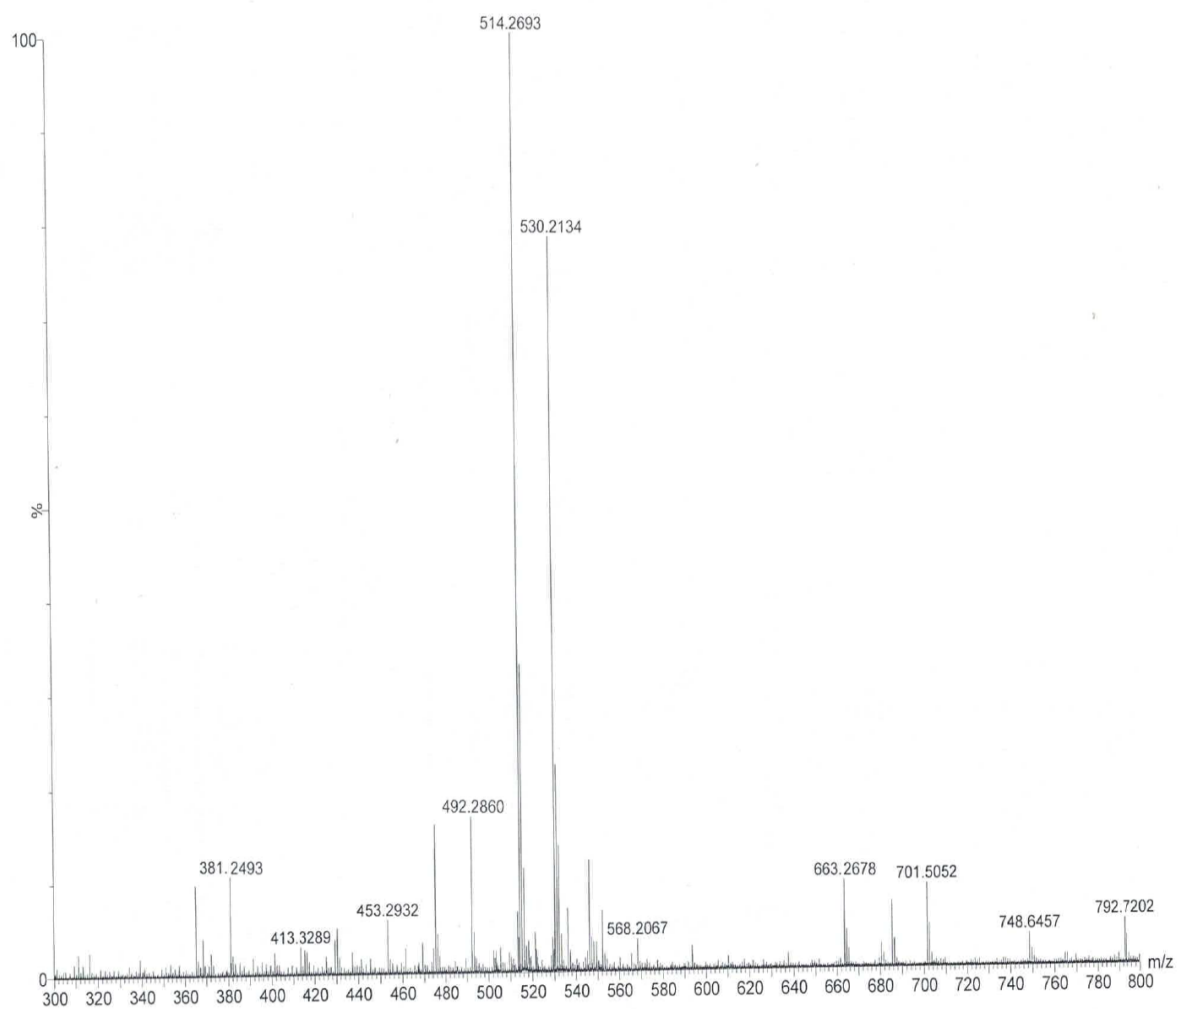

Datafile Name: Peptide 3

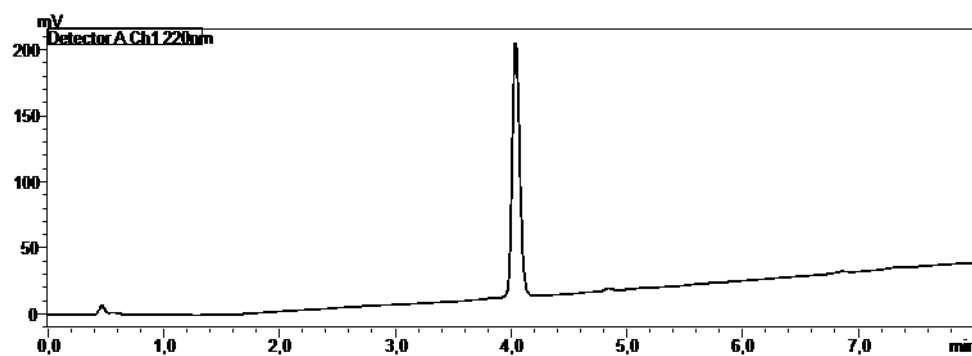

Figure S1. HR-ESI-MS of Peptide 3 ion  $[M+H]^+$  and analytical HPLC trace at 220 nm.

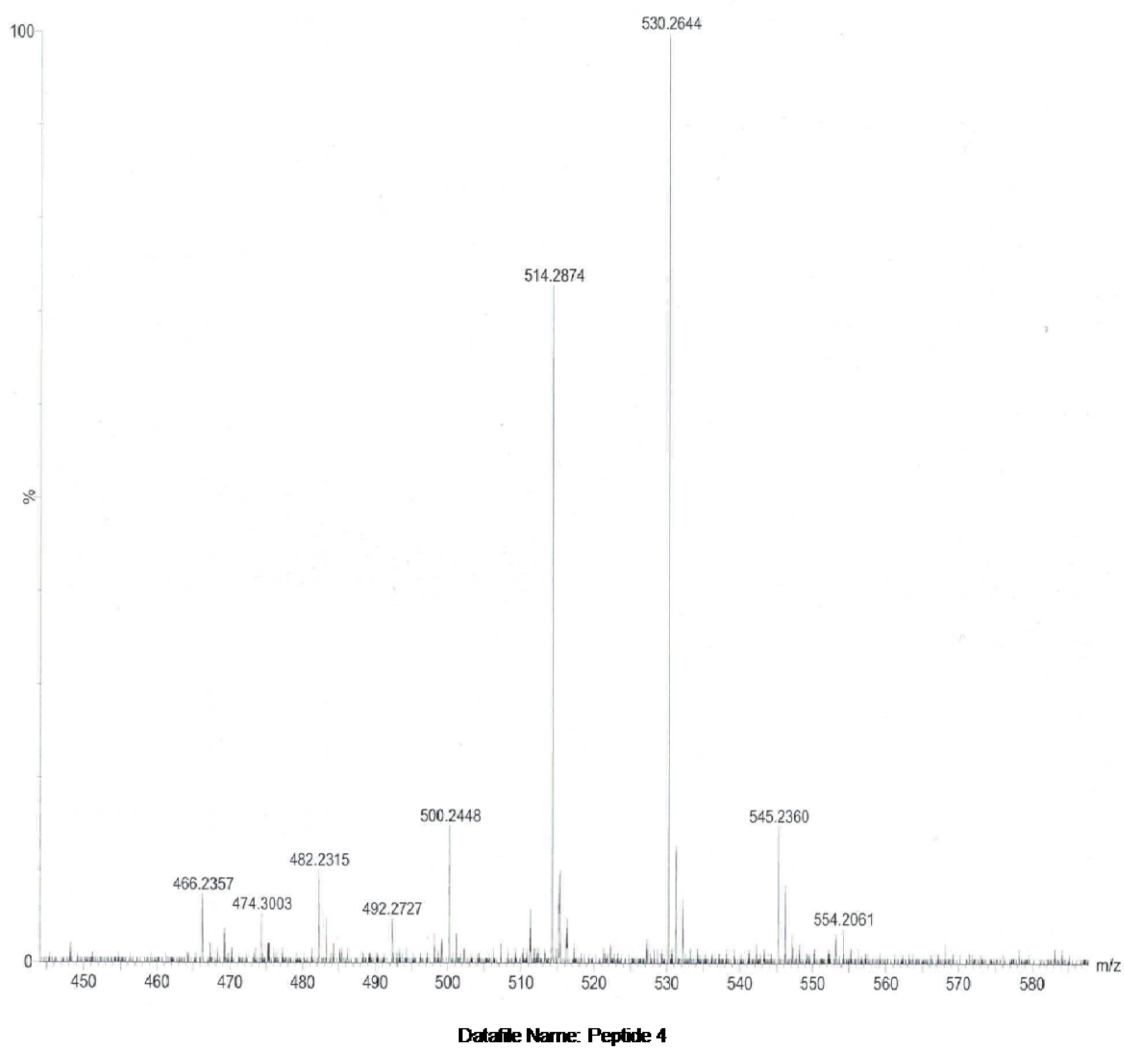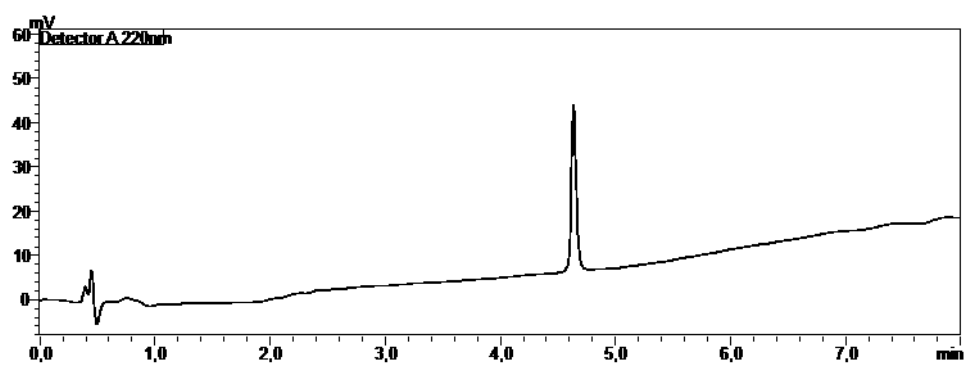

**Figure S2.** HR-ESI-MS of Peptide 4 ion  $[M+H]^+$  and analytical HPLC trace at 220 nm.

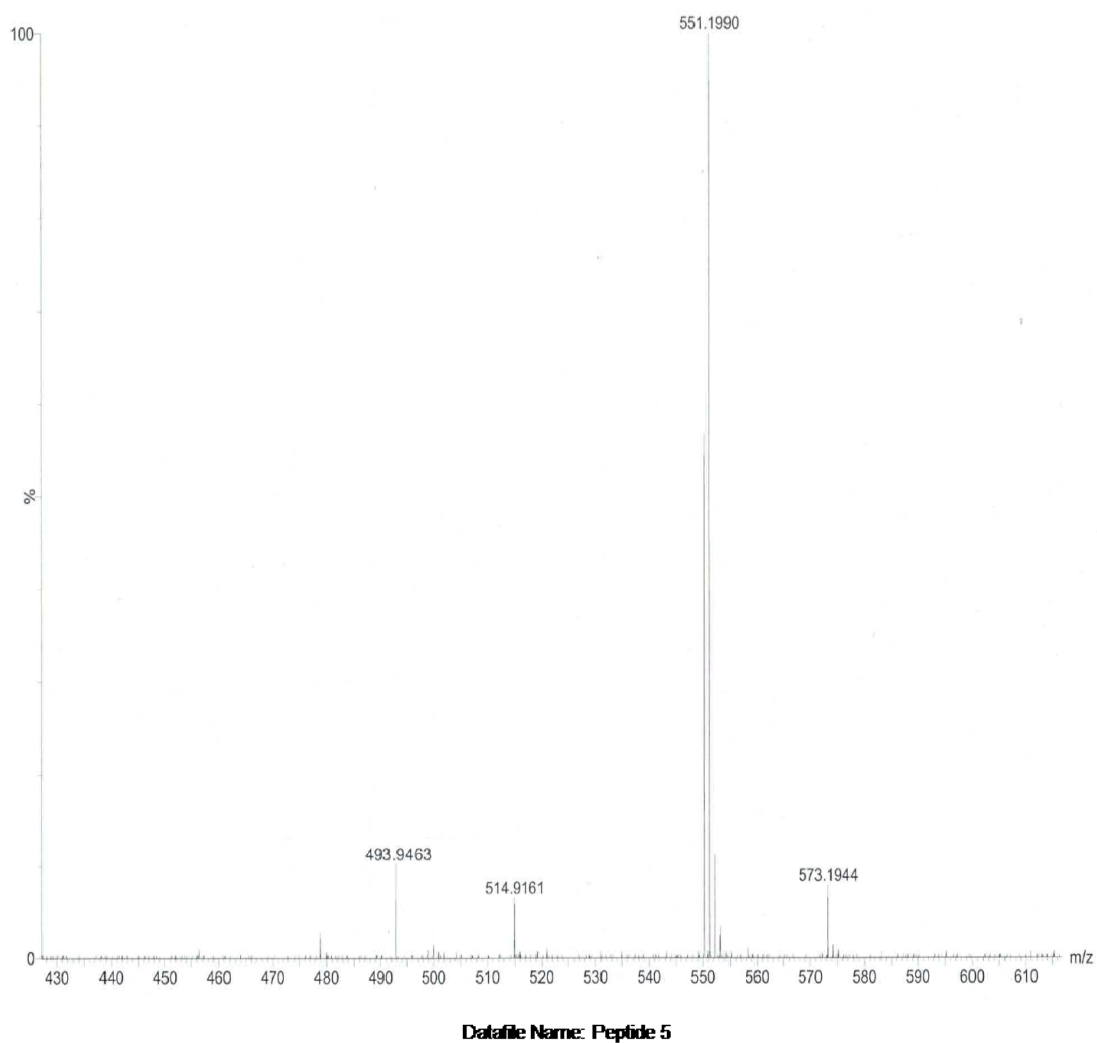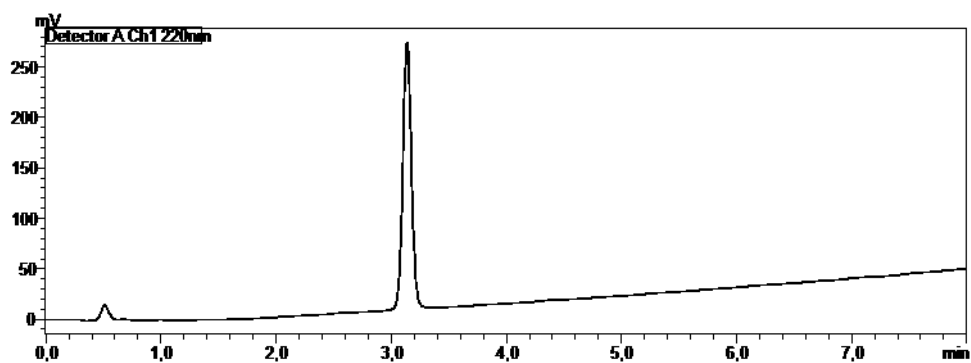

**Figure S3.** HR-ESI-MS of Peptide **5** ion  $[M+H]^+$  and analytical HPLC trace at 220 nm.

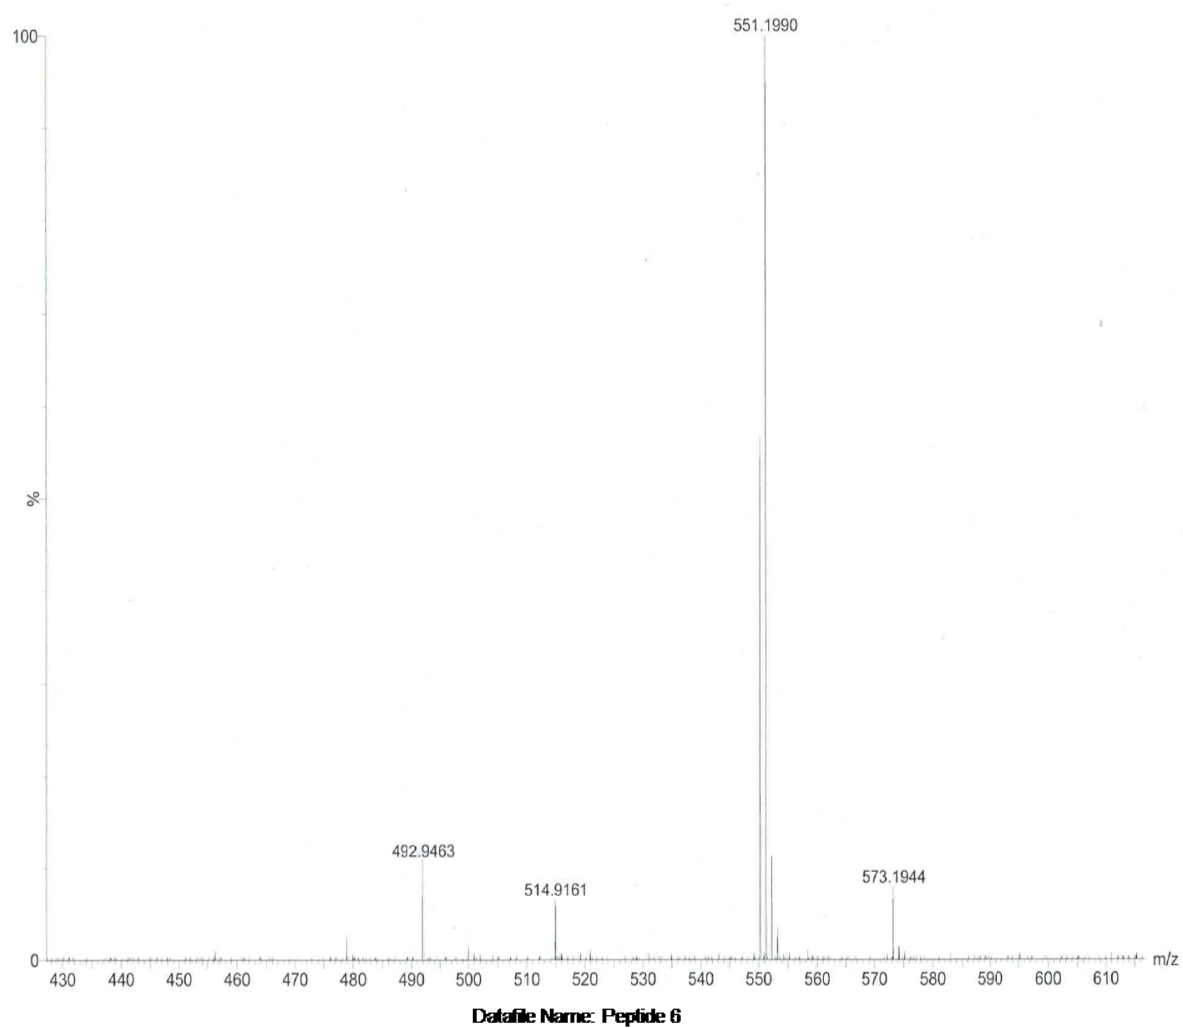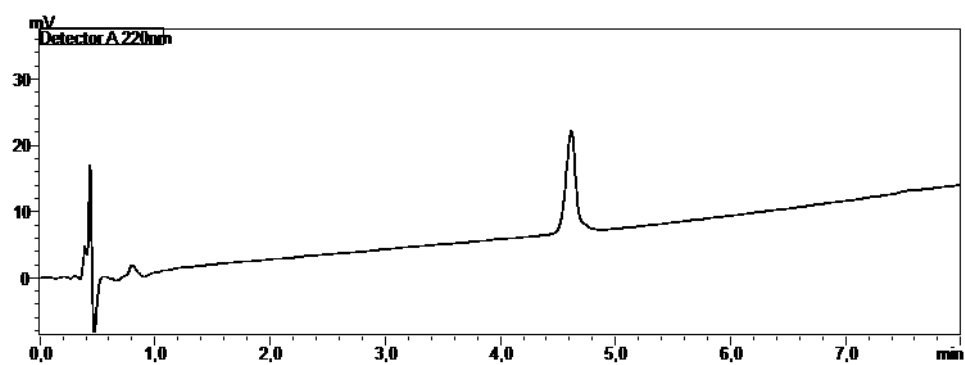

**Figure S4.** HR-ESI-MS of Peptide 6 ion  $[M+H]^+$  and analytical HPLC trace at 220 nm.

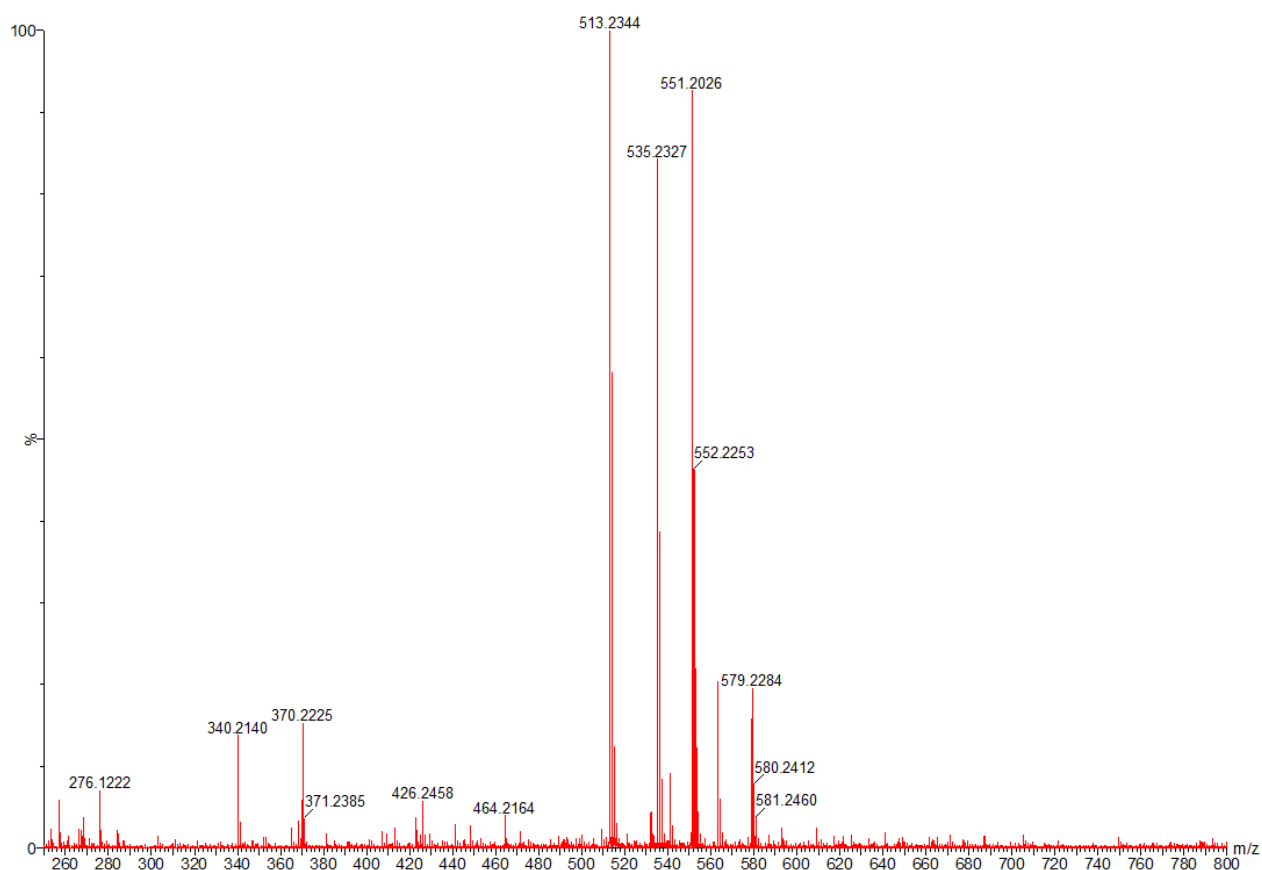

Datafile Name: Peptide 7

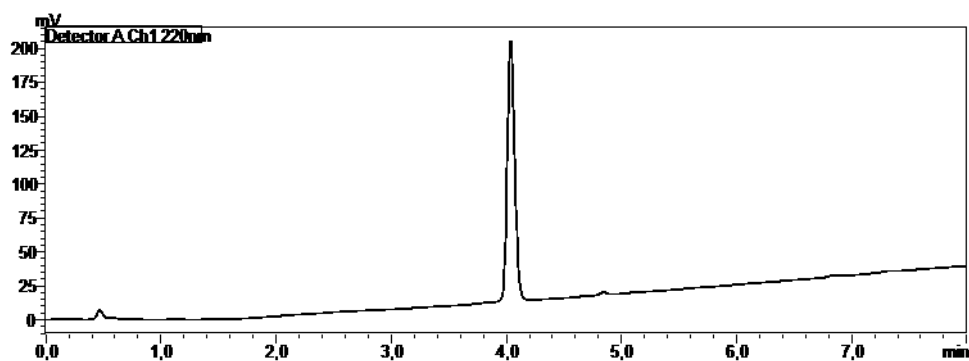

Figure S5. HR-ESI-MS of Peptide 7 ion  $[M+H]^+$  and analytical HPLC trace at 220 nm.

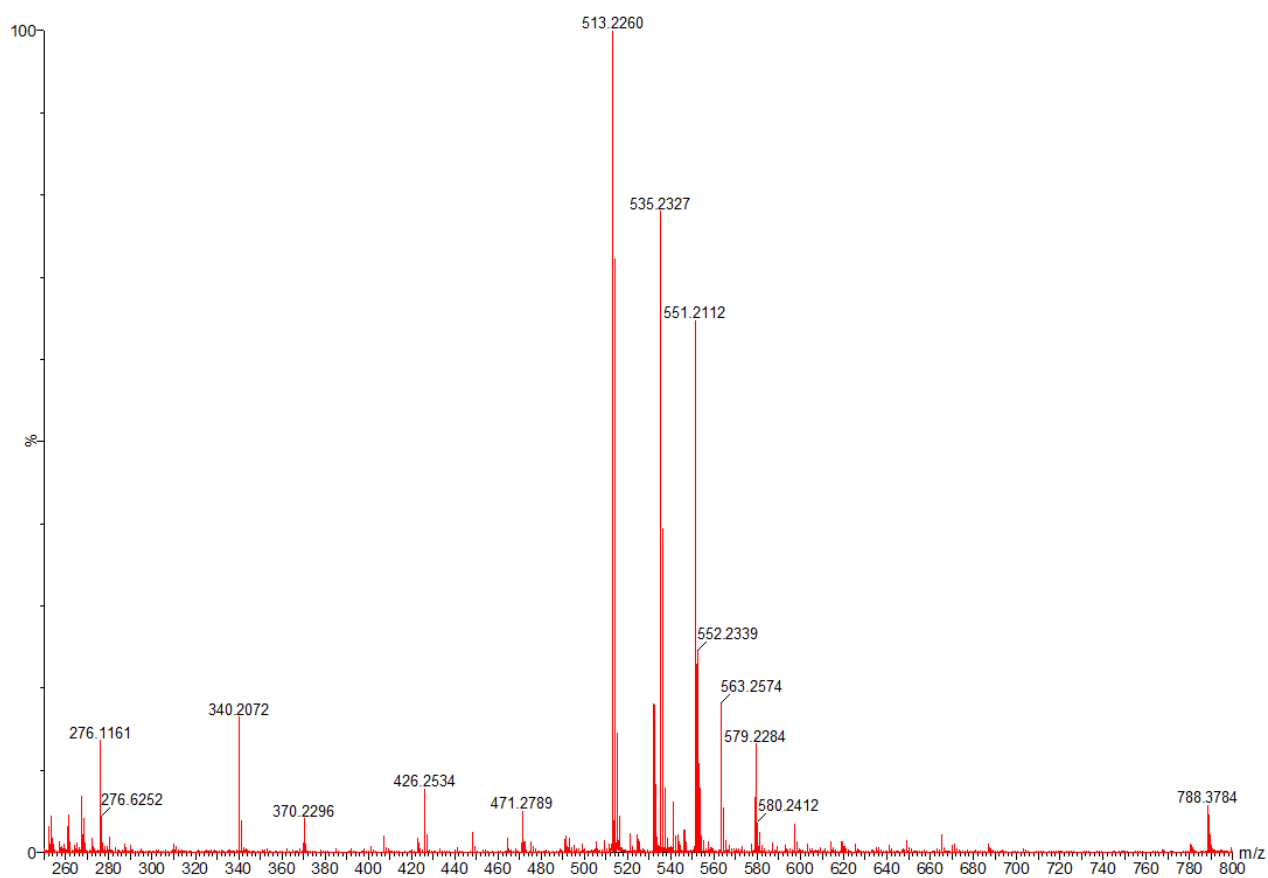

Datafile Name: Peptide 8

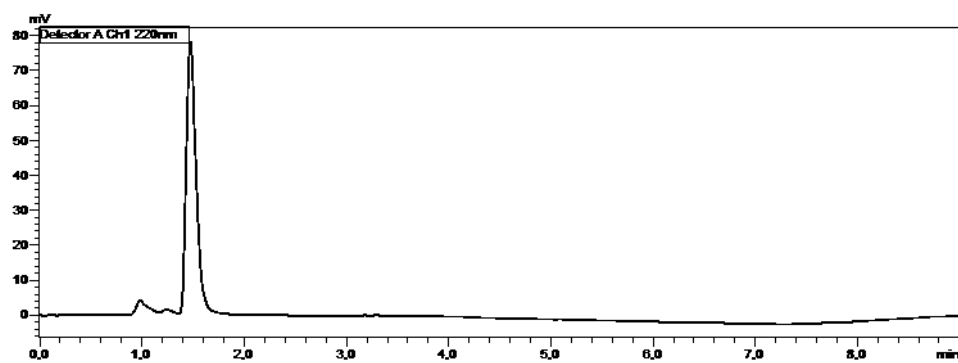

**Figure S6.** HR-ESI-MS of Peptide 8 ion  $[M+H]^+$  and analytical HPLC trace at 220 nm.



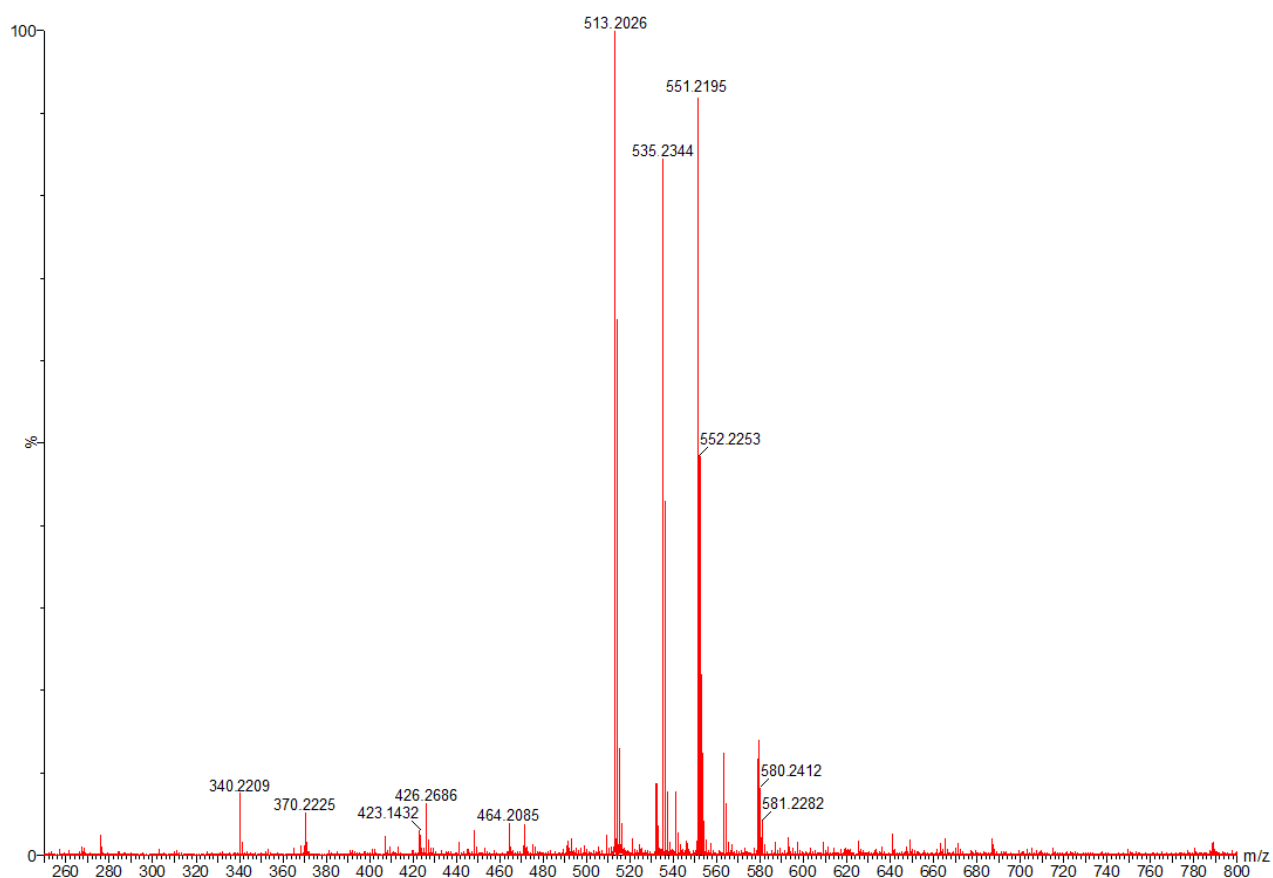

Datafile Name: Peptide 9

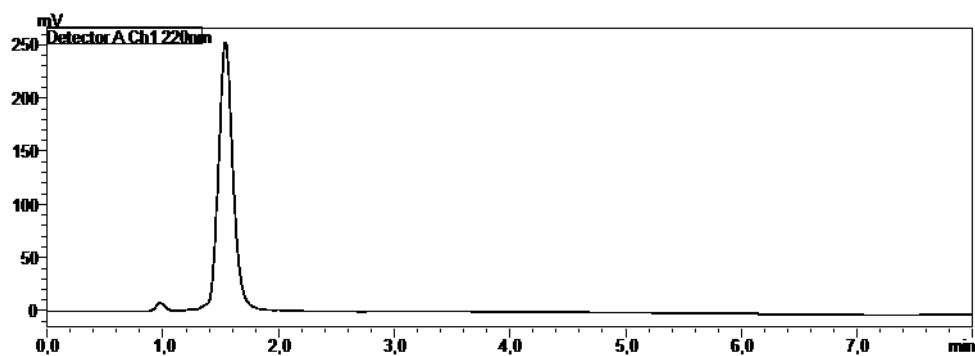

Figure S7. HR-ESI-MS of Peptide 9 ion  $[M+H]^+$  and analytical HPLC trace at 220 nm.

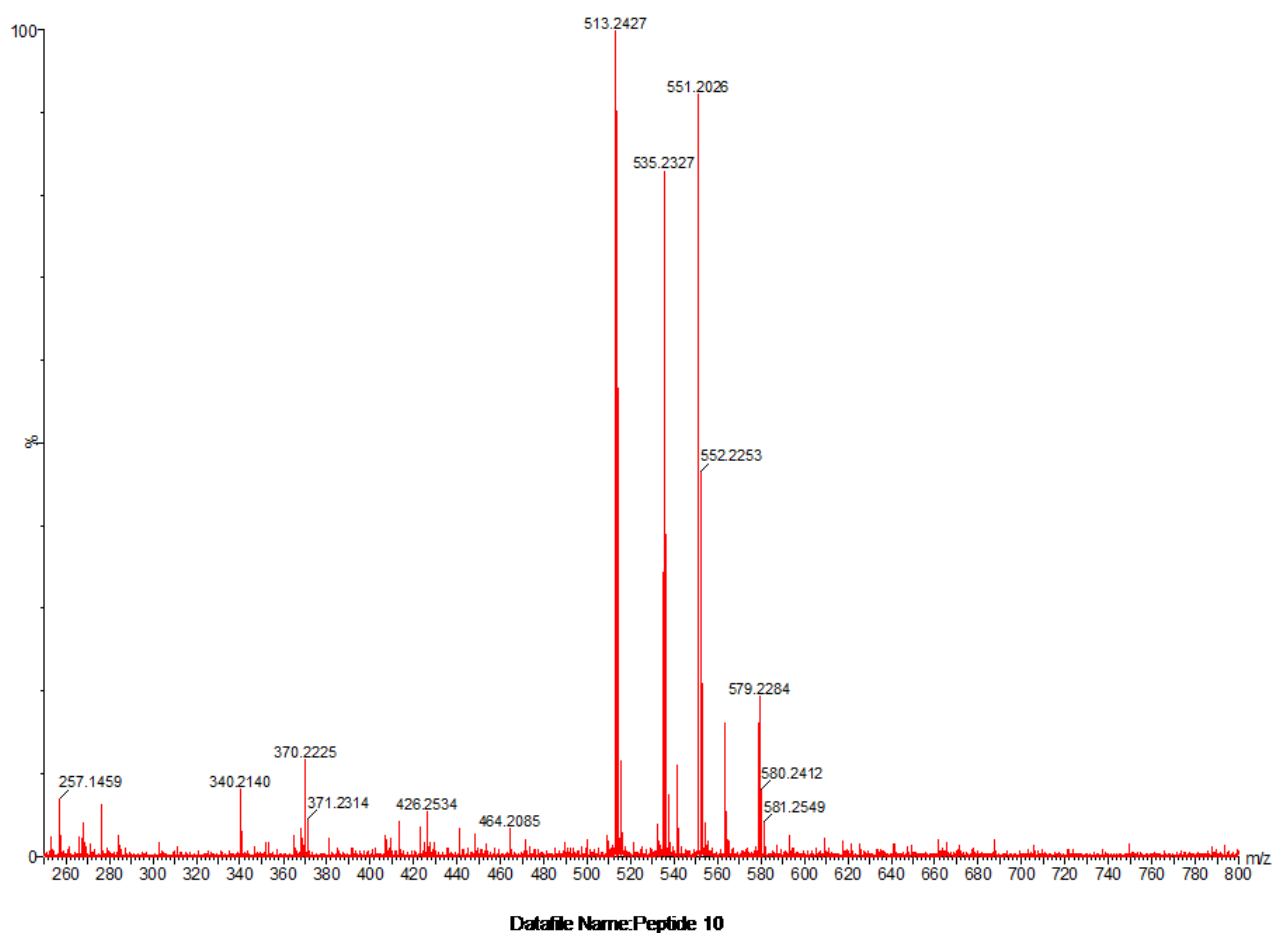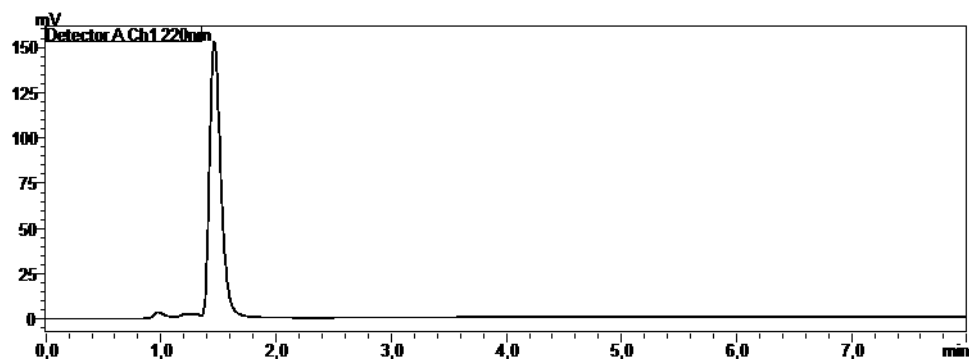

Figure S8. HR-ESI-MS of Peptide 10 ion  $[M+H]^+$  and analytical HPLC trace at 220 nm.

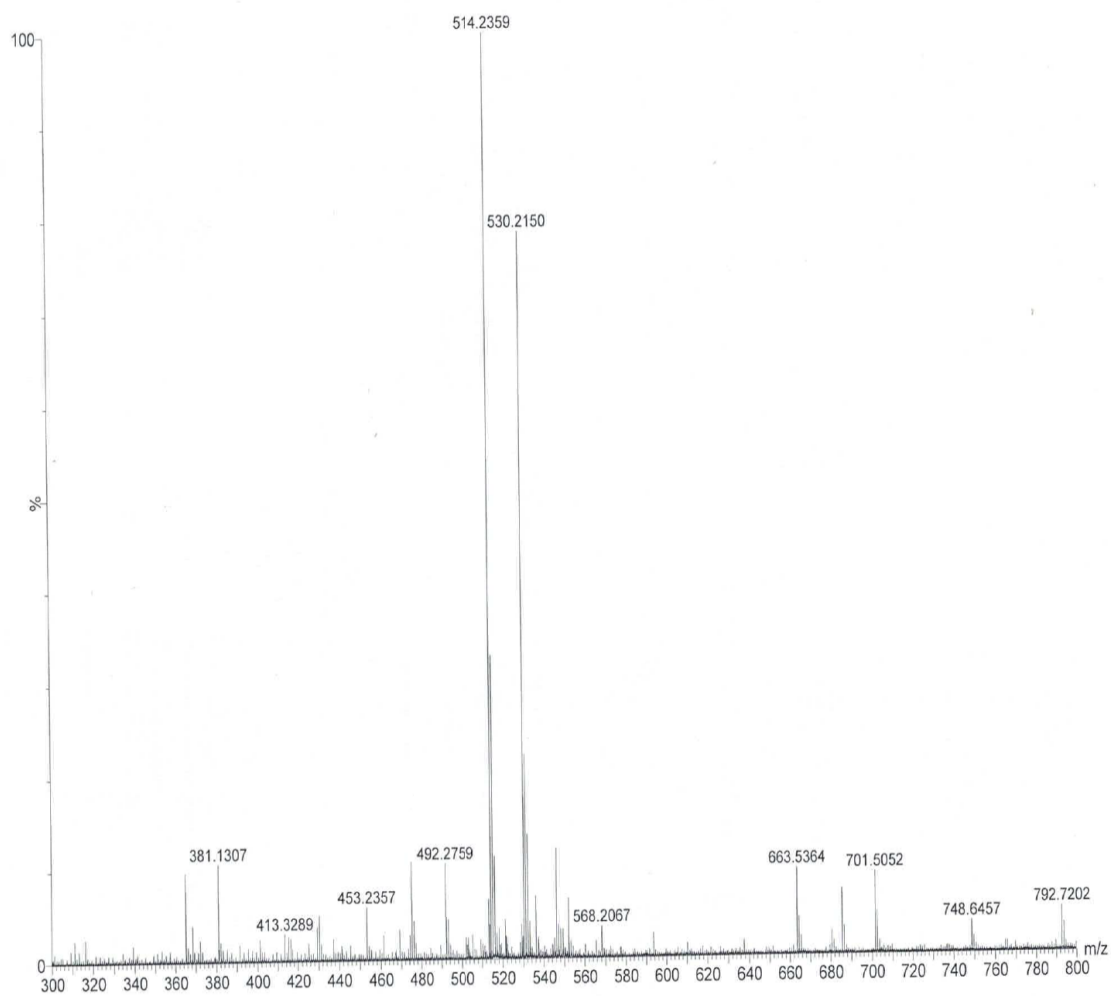

Datafile Name: Peptide 11

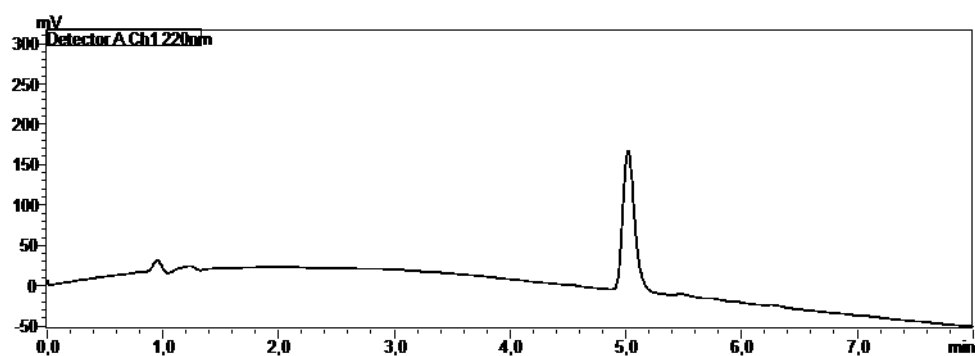

Figure S9. HR-ESI-MS of Peptide 11 ion  $[M+H]^+$  and analytical HPLC trace at 220 nm.

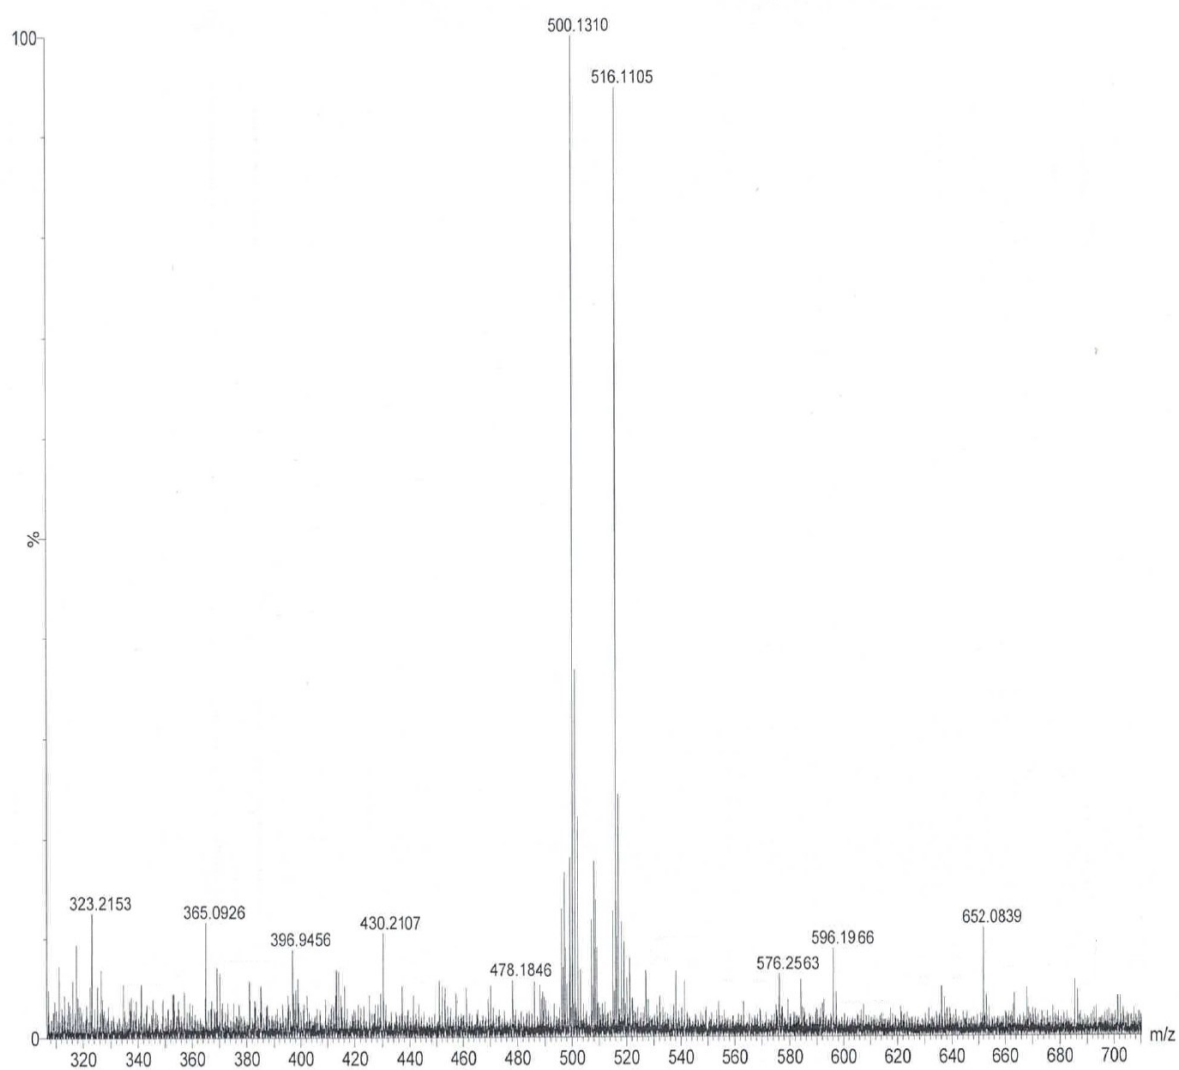

Datafile Name: Peptide 12

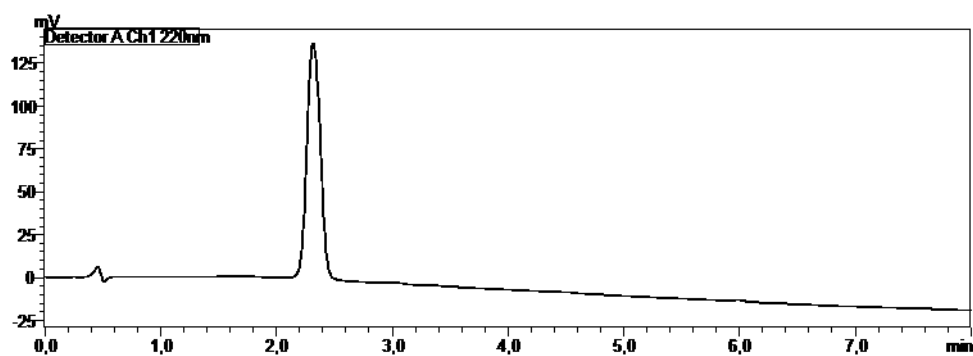

Figure S10. HR-ESI-MS of Peptide 12 ion  $[M+H]^+$  and analytical HPLC trace at 220 nm.

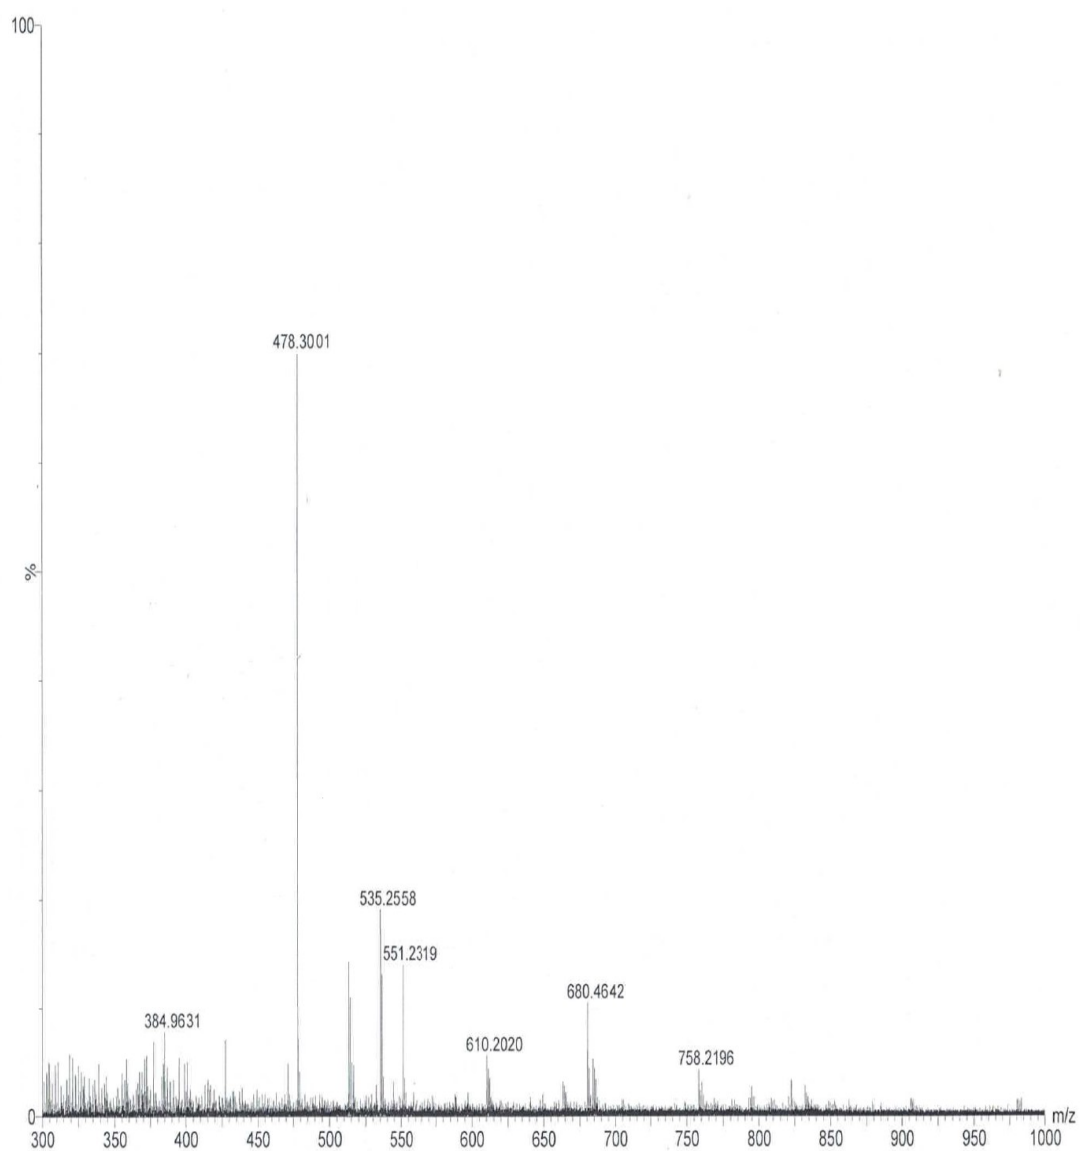

Datafile Name: Peptide 13

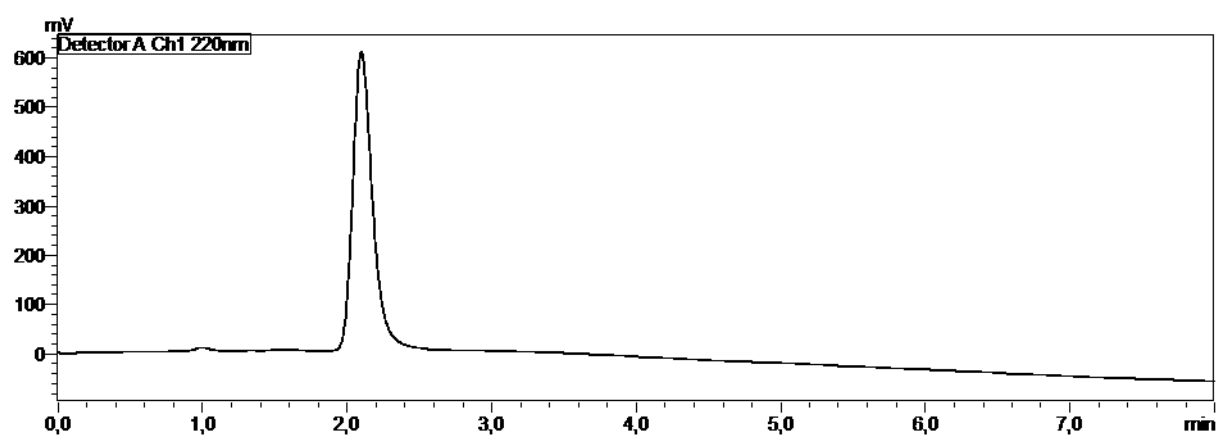

Figure S11. HR-ESI-MS of Peptide 13 ion  $[M+H]^+$  and analytical HPLC trace at 220 nm.

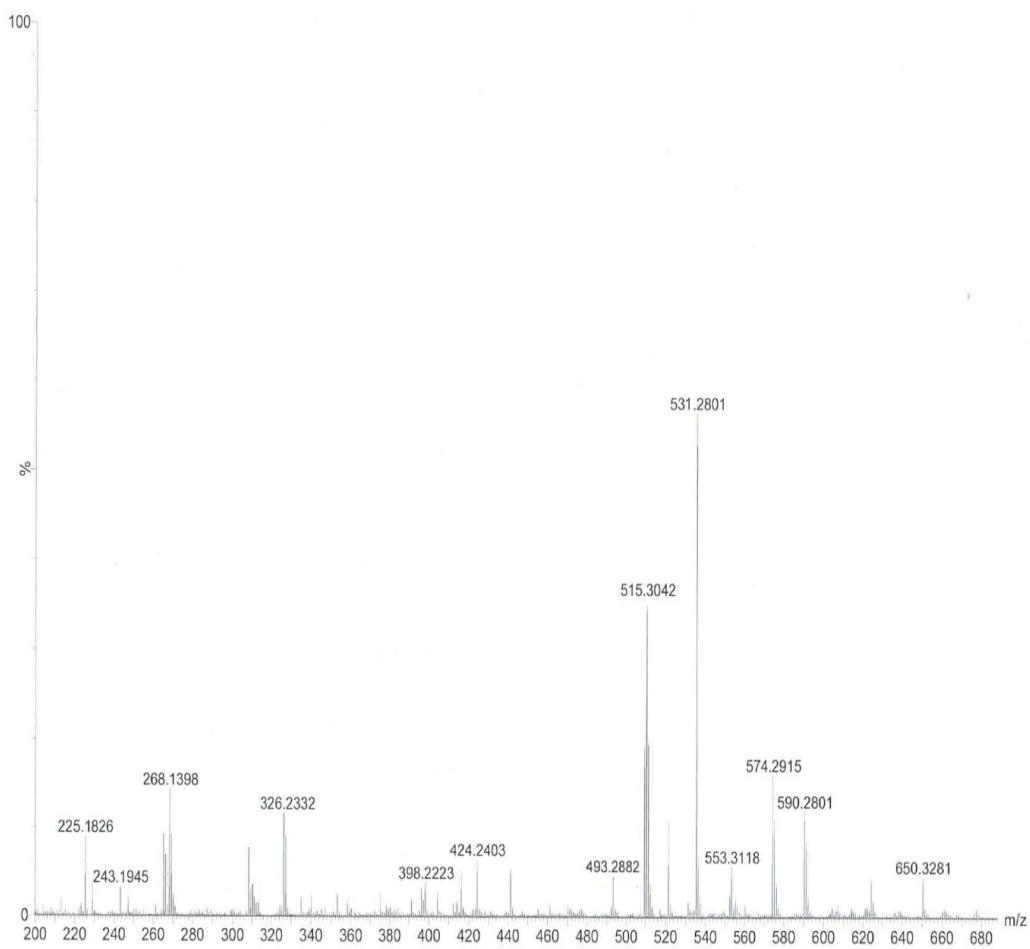

Datafile Name: Peptide 14

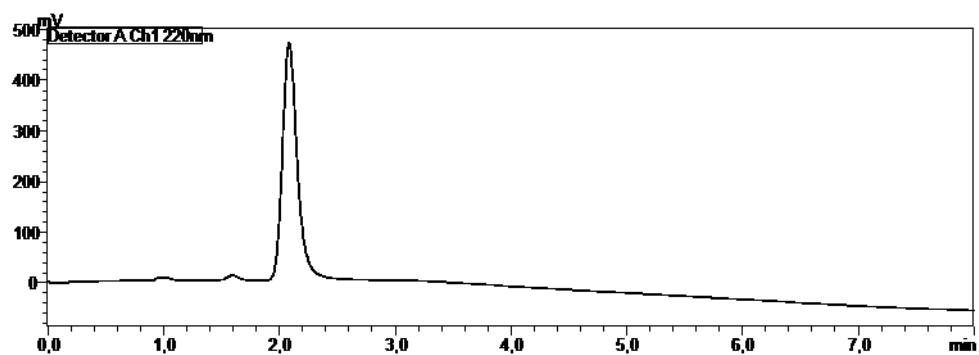

**Figure S12.** HR-ESI-MS of Peptide 14 ion  $[M+H]^+$  and analytical HPLC trace at 220 nm.

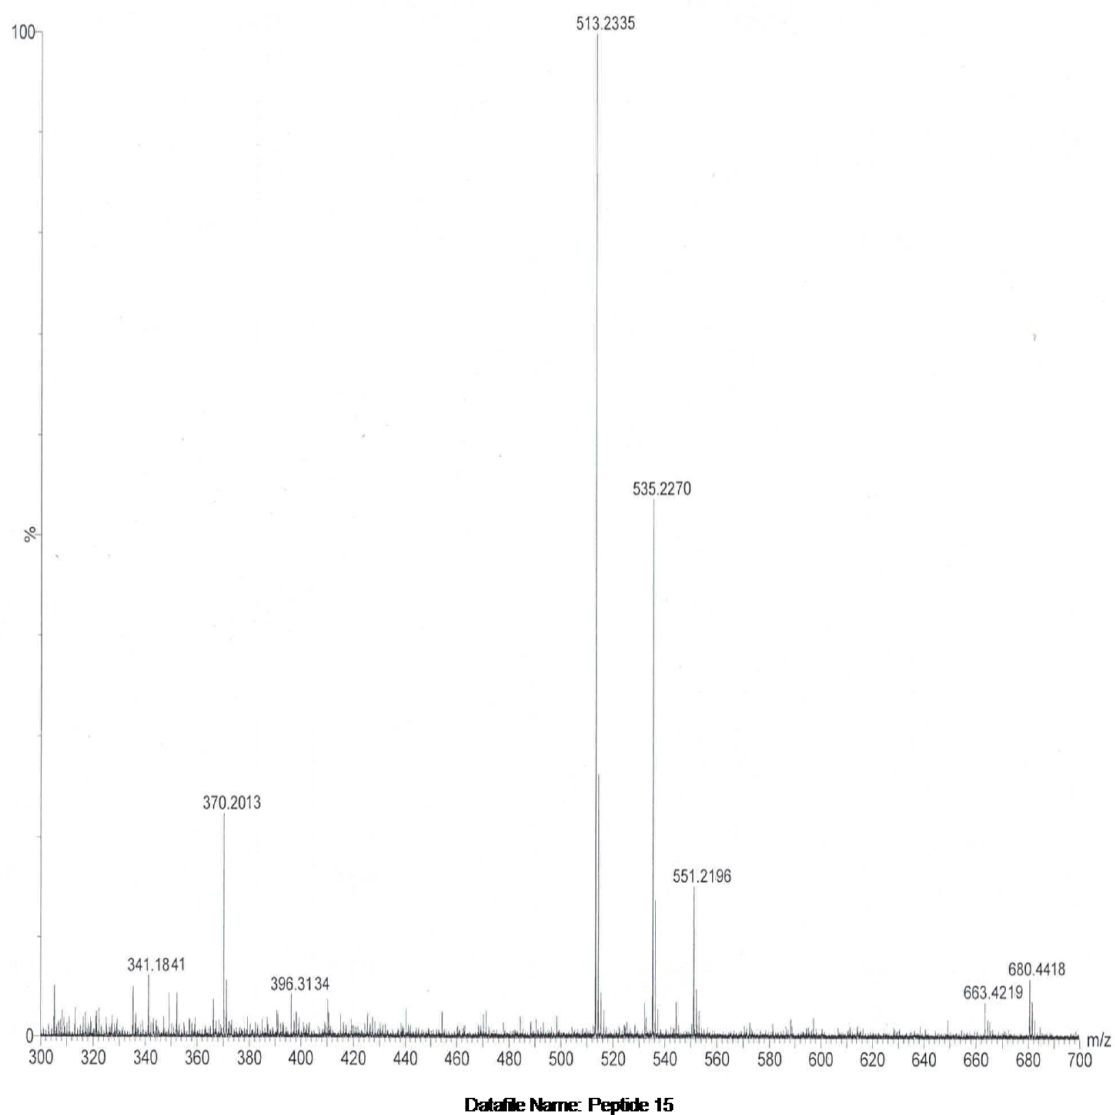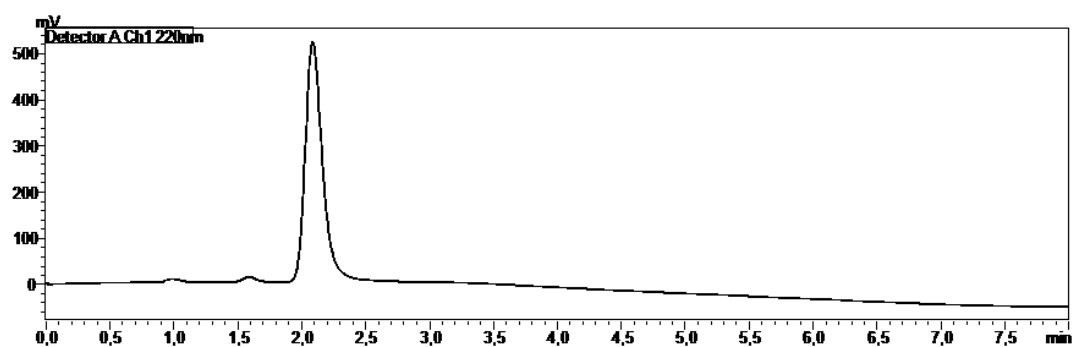

Figure S13. HR-ESI-MS of Peptide 15 ion  $[M+H]^+$  and analytical HPLC trace at 220 nm.

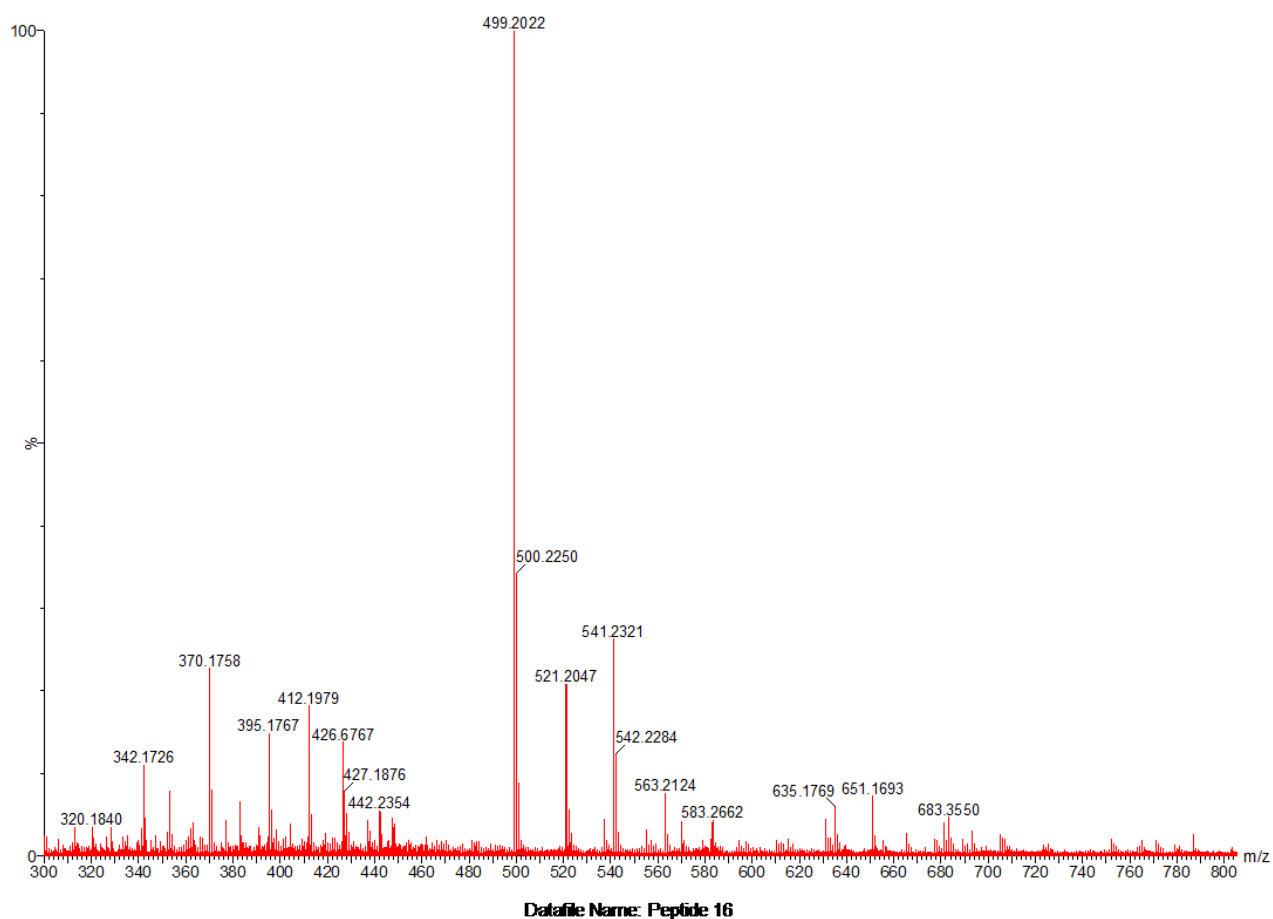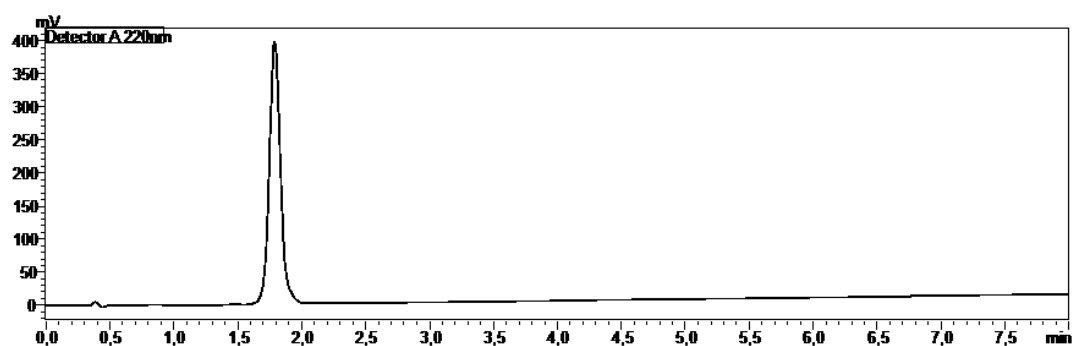

Figure S14. HR-ESI-MS of Peptide 16 ion  $[M+H]^+$  and analytical HPLC trace at 220 nm.



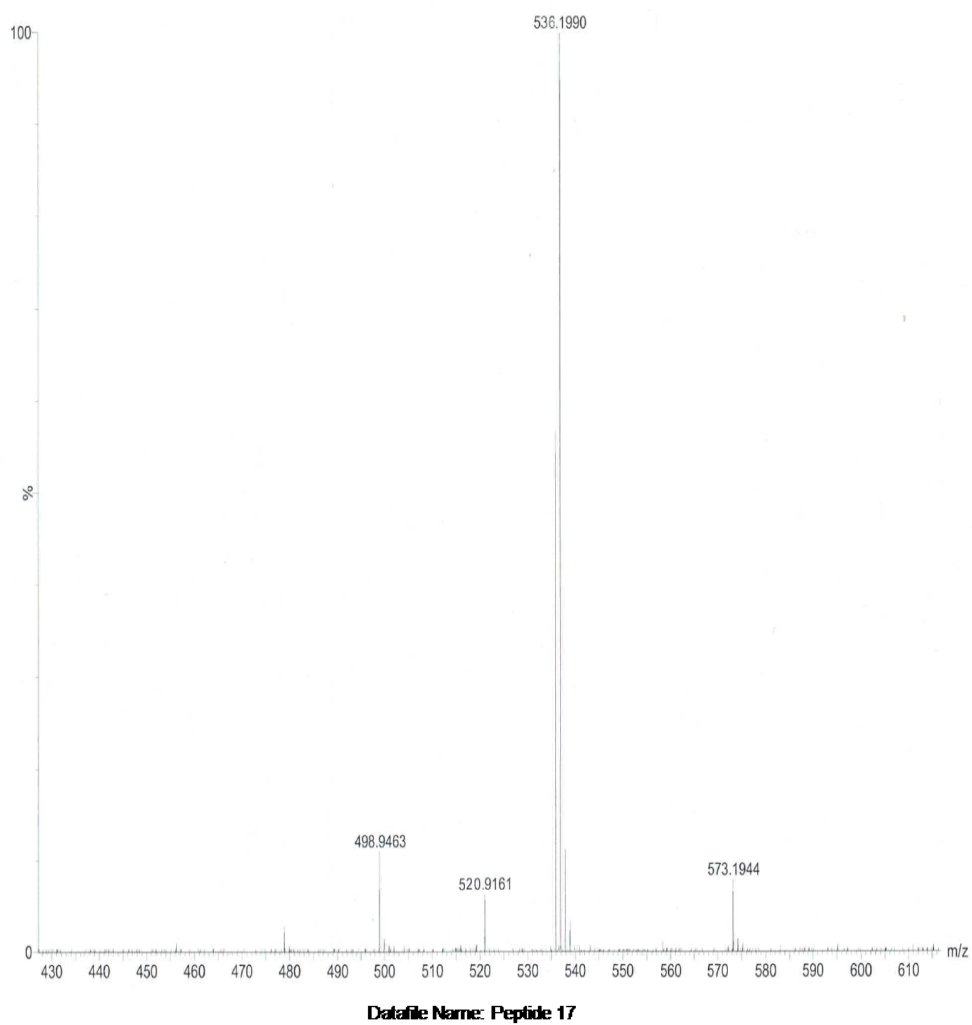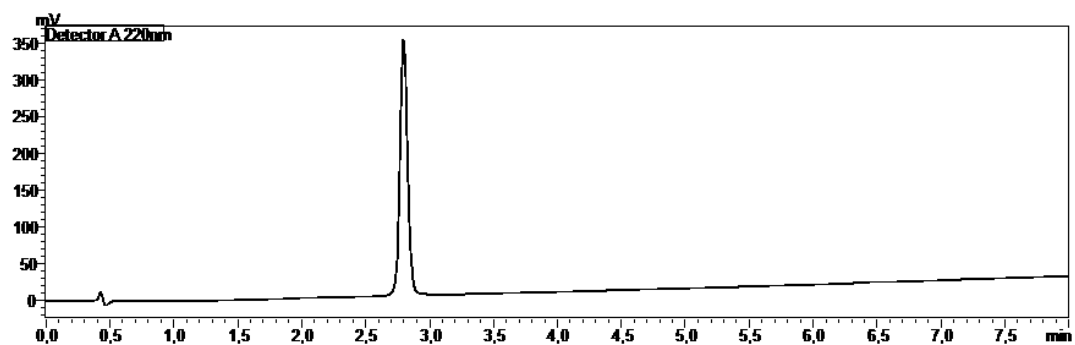

**Figure S15.** HR-ESI-MS of Peptide 17 ion  $[M+H]^+$  and analytical HPLC trace at 220 nm.

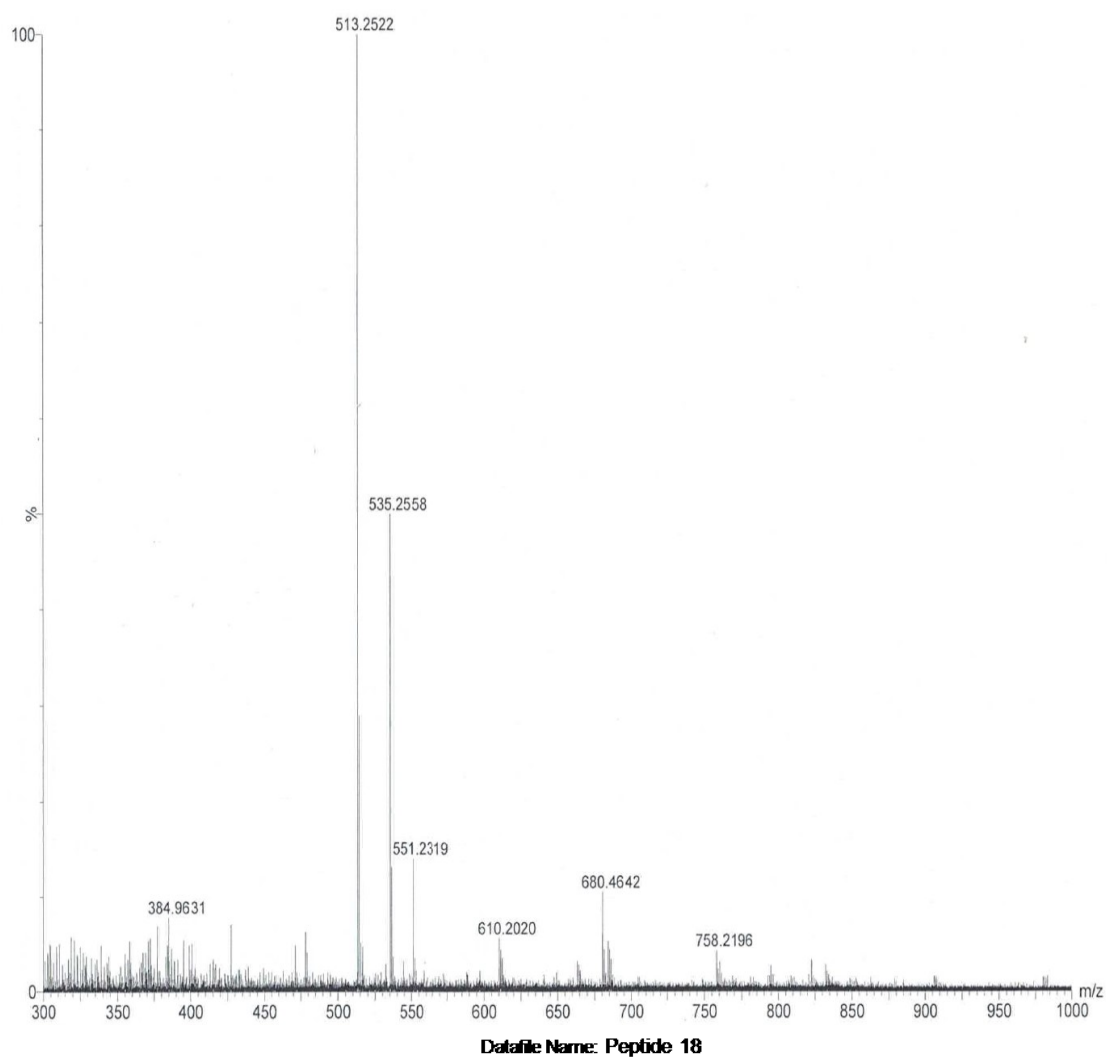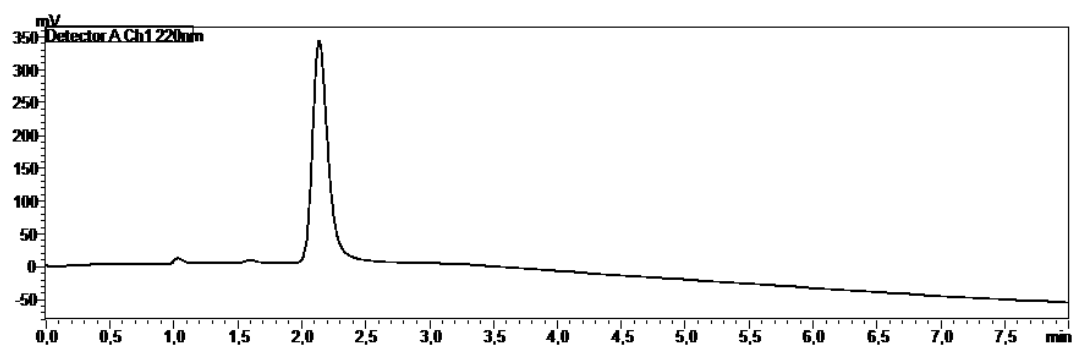

**Figure S16.** HR-ESI-MS of Peptide 18 ion  $[M+H]^+$  and analytical HPLC trace at 220 nm.

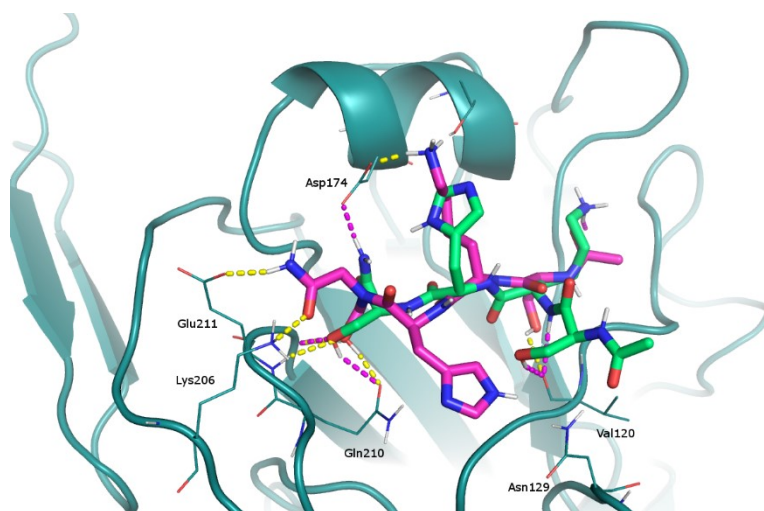

**Figure S17.** Superimposition of the docked poses of peptoid **18** and reference tetrapeptide **2** represented as sticks (magenta and green C atoms, respectively) in the RBS of A/Parma/24/09 H1N1 (deep-cyan cartoon). Just the HA residues that interact with the ligands are shown as lines for clarity's sake. H-bonds are represented as yellow dashed lines for ligand **18** and magenta for ligand **2**.

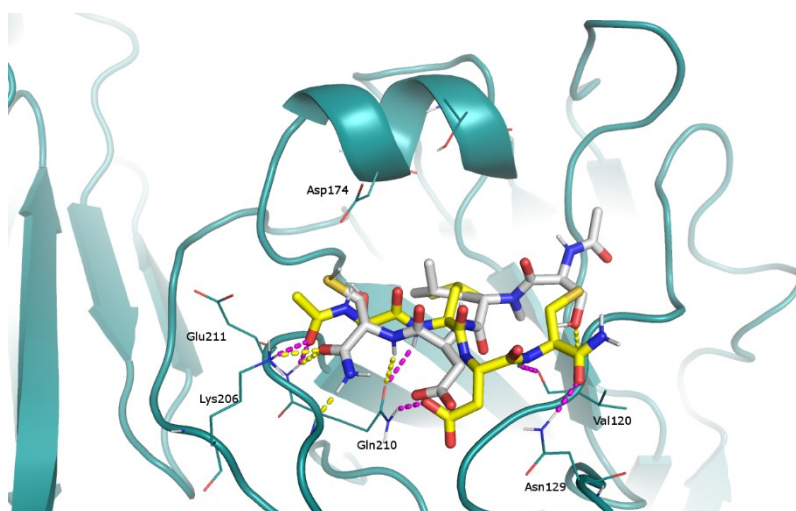

**Figure S18.** Superimposition of the docked poses of N-methyl peptides **4** and reference tetrapeptide **1** represented as sticks (white and yellow C atoms, respectively) in the RBS of A/Parma/24/09 H1N1 (deep-cyan cartoon). Just the HA residues that interact with the ligands are shown as lines for clarity's sake. H-bonds are represented as yellow dashed lines for ligand **4** and magenta for ligand **1**.

To assess the validity of the docking protocol, the X-ray ligand 6'-sialyl-N-acetylglucosamine was redocked in the receptor binding site of the H1 HA (PDB ID: 3UBN, Proc. Natl. Acad. Sci. USA **2018**, 115, 4240–4245).

Both Glide SP-peptide and Glide SP docking protocols were applied obtaining comparable results. The RMSD calculated superimposing the crystallographic and docked poses are 0.86 and 0.81, and obtained docking score values are -6.597 and -6.673 with Glide SP-peptide and Glide SP, respectively. (Figure S19)

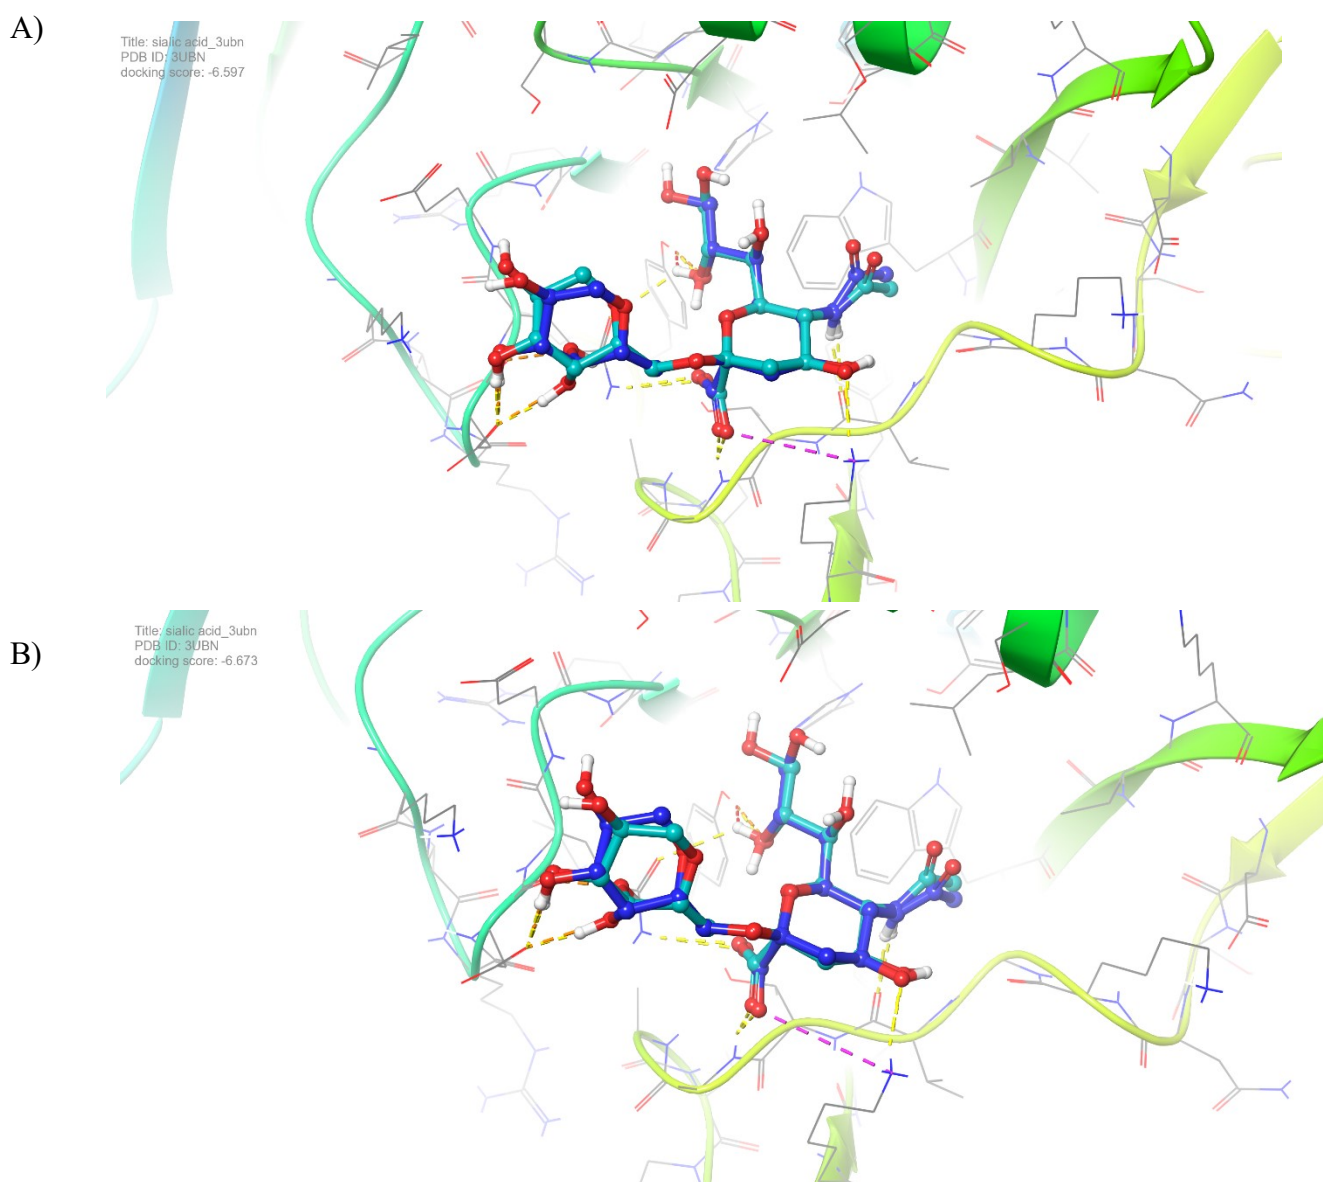

**Figure S19.** 6'-sialyl-N-acetylglucosamine in its X-ray geometry (blue C atoms), superimposed to its best docked pose (cyan C atoms) obtained with the Glide SP-peptide (panel A) and Glide SP docking protocol (panel B). H-bonds and ionic contacts are represented respectively as yellow and purple dashed lines; the docking score value is reported in the high left corner.
